# Supplementary material for: Comprehensive survey of conserved RNA secondary structures in full-genome alignment of Hepatitis C virus
Source: PubMed Central journal article supplement (PMC11219754; doi:10.1038/s41598-024-62897-0), 2024-07-02
Supplement: 41598_2024_62897_MOESM1_ESM.pdf [file 41598_2024_62897_MOESM1_ESM.pdf]

## Supplementary Information

### Files

- F1 - original data set in Fasta (fasta) format
- F2 - pre-filtered data set in Fasta (fasta) format
- F3 - phylogenetic tree in Newick (treefile) and Nexus (nex) format
- F4 - representative genomes in Fasta (fasta) format
- F5 - nucleotide alignment in ClustalW (clustal), Fasta (fasta), and Stockholm (stk) format (latter format with additional annotations such as RNA secondary structures and genes)
- F6 - protein alignment in ClustalW (clustal), Fasta (fasta), and Stockholm (stk) format
- F7 - nucleotide and protein alignment in Stockholm (stk) format (with additional annotations such as RNA secondary structures and genes)
- F8 - alignment of the 5' UTR (51 sequences) in Stockholm (stk), ClustalW (clustal), and Fasta (fasta) format
- F9 - alignment of the 3' X-tail (11 sequences) in Stockholm (stk), ClustalW (clustal), and Fasta (fasta) format

### Clustering

**Table S1.** Clustering results of the initial HCV data set using ViralClust<sup>36</sup>. #Seqs – Number of Sequences; #Clstr – Number of Cluster; minClstr – Smallest Cluster; maxClstr – Largest Cluster; avClstr – Average Cluster Size; medClstr – Median Cluster Size; #UnclstrSeqs – Number of Unclustered Sequences

| Algorithm  | #Seqs | #Clstr | minClstr | maxClstr | avClstr | medClstr | #UnclstrSeqs |
|------------|-------|--------|----------|----------|---------|----------|--------------|
| HDBSCAN    | 2549  | 36     | 7        | 583      | 67.42   | 20       | 121          |
| cd-hit-est | 2549  | 105    | 2        | 580      | 22.32   | 3        | 205          |
| sumacust   | 2549  | 77     | 2        | 464      | 23.43   | 3        | 131          |
| MMseqs2    | 2549  | 100    | 2        | 623      | 23.59   | 3        | 190          |
| vclust     | 2549  | 124    | 2        | 535      | 19.22   | 3        | 166          |

### Genome completeness of representative genomes

- Complete Genome:  
NC\_009823.1, NC\_004102.1, NC\_009827.1, NC\_030791.1, AB047639.1, JF735122.1, MG717928.1, AF169004.1, JF735124.1, MH427311.1, AJ851228.1, KM504115.1, KJ470619.1, KJ439768.1, MK139017.1, DQ278891.1, EU158186.1, KJ678751.1, FJ462437.1, KC248199.1, KJ439777.1, JX227965.1, AY878652.1, MG717925.1, KY348757.1, EU234061.2, EU234065.2
- Complete CDS:  
NC\_009824.1, NC\_009825.1, NC\_009826.1, NC\_038882.1, KC197233.1, MN628597.1, KM043284.1, MH590700.1, AB677533.1, KC197230.1, KC844040.1, KY620874.1, KY620603.1, MK327987.1, AY232740.1, MW689975.1, MW690013.1, MW689965.1, MN977327.1, MK548369.1, MW689971.1, AY587845.1, LC435023.1, KX767023.1, MW689962.1, MW689980.1, MG878999.1, MN164860.1, MN164851.1, MN164872.1

### **Alignment confirms previously predicted RNA secondary structures – Additional Information**

In addition to the description of the conserved RNA secondary structures in the main text, here we would like to detail one aspect of possible alternative structures. Confirming our previous *in silico* results<sup>10</sup>, we find the conserved capability of the IRES sequence to form a predicted alternative conformation of the SL IIIId, the SL IIIId\*, at the base of the domain III of the IRES (Figure S2 A and B, and also see the alignment with the StructConsensus and Consensus outputs in Figure S3). Also in our RNA secondary structure alignment presented here, covering the sequence space of virtually all HCV isolates, the alternative SL IIIId\* structure is conserved in the predicted IRES structure with an MFE slightly lower than the IRES structure that comes with the classical SL IIIId form. Even though the classical SL IIIId has been repeatedly experimentally validated and shown to be functionally important<sup>12,74–78</sup>, the structure presented here may have functional importance. This hypothesis is based on the lower MFE of this SL IIIId\* structure and on the following aspects. The sequence GCGAAA in the apical loop of the predicted alternative SL IIIId\* is virtually completely conserved, although this sequence is also partially single-stranded in the classical SL IIIId form, a situation that likely would allow for possible sequence variation. Moreover, the five base pair stem carrying the apical GCGAAA loop of the SL IIIId\* is structurally conserved by covariations, although the classical SL IIIId overlaps with that sequence, underlining the importance of the SL IIIId\*. Last but not least, the stem of the alternative SL IIIId\* appears to be slightly more stable by the number of base pairs that can be formed. We can only speculate if this alternative SL IIIId\* represents a structure that may be important in the IRES when not bound to ribosomes, likely after NS5B has bound the CRE/5BSL3.2 and by that interferes with the long-range interaction (LRI) between SL IIIId and the bulge of the CRE, i.e. in the course of the switch from translation to replication.



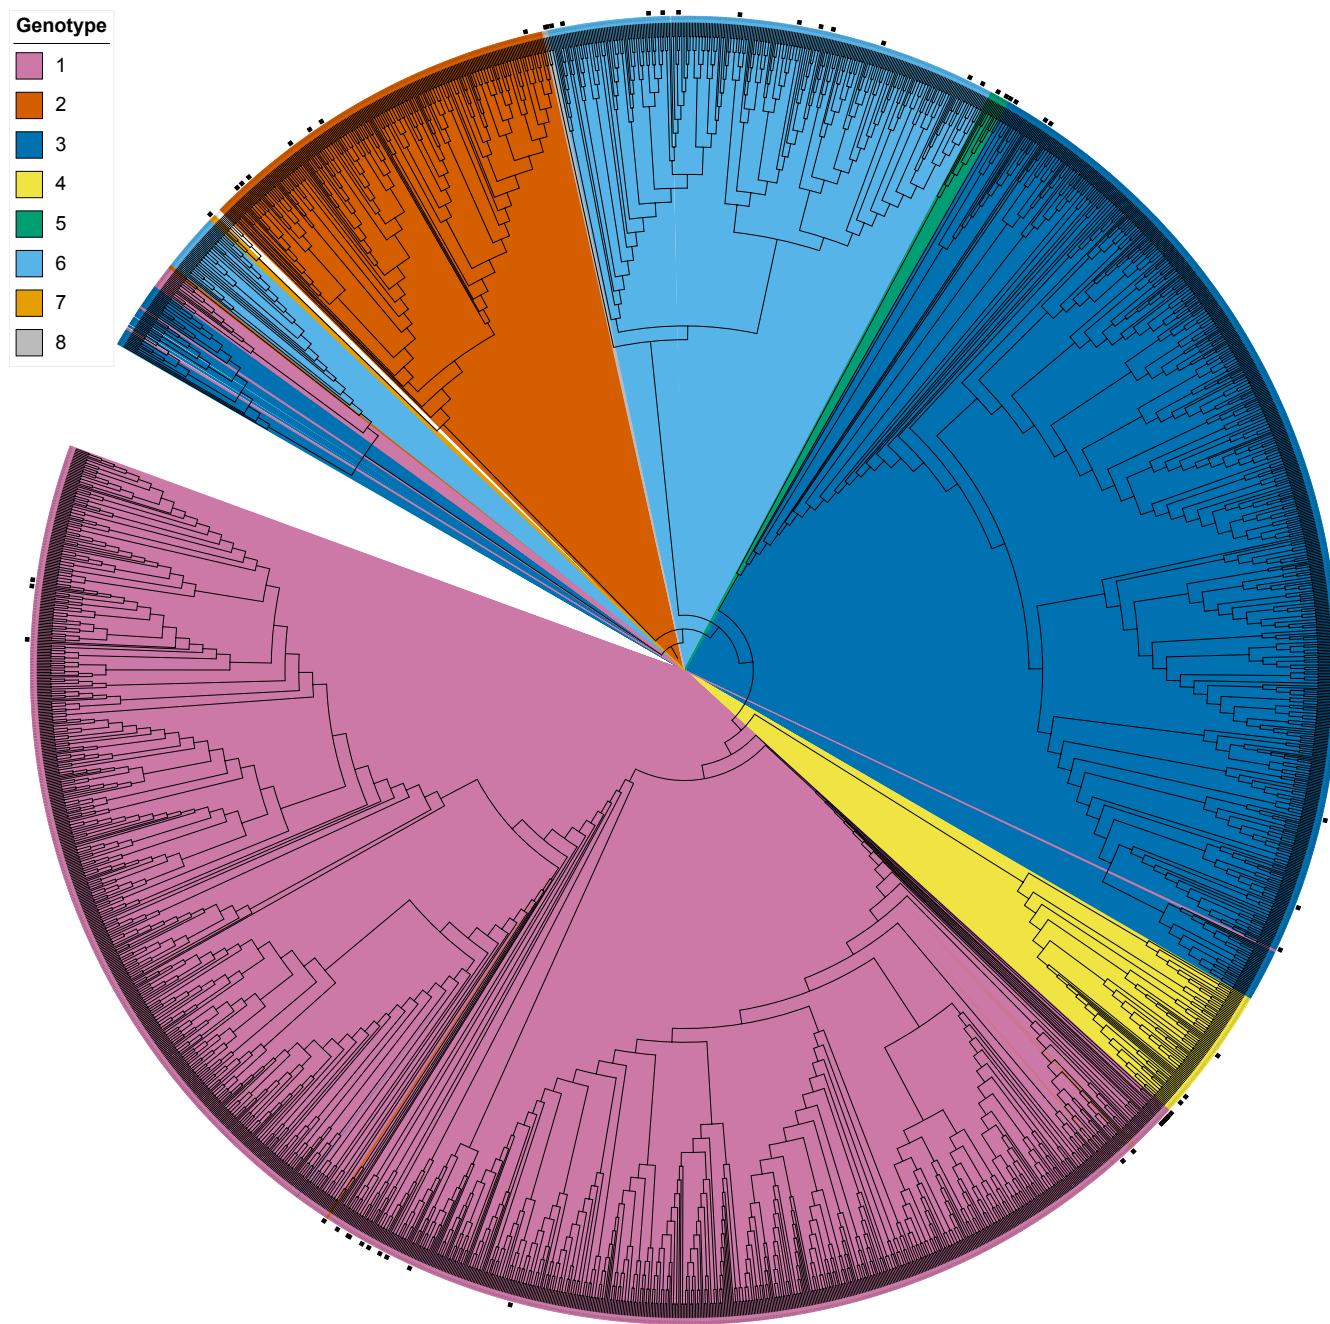

**Figure S1.** Phylogenetic tree of 2 549 HCV genomes obtained from BV-BRC database. The tree was reconstructed using IQ-TREE <sup>279</sup>, employing an alignment generated by MAFFT<sup>38</sup>. The data set comprises all eight genotypes. While a few outliers are observed, the phylogenetic tree demonstrates clustering patterns corresponding to the different genotypes. The 57 representative genomes used for alignment construction are labeled with black boxes.

**A**

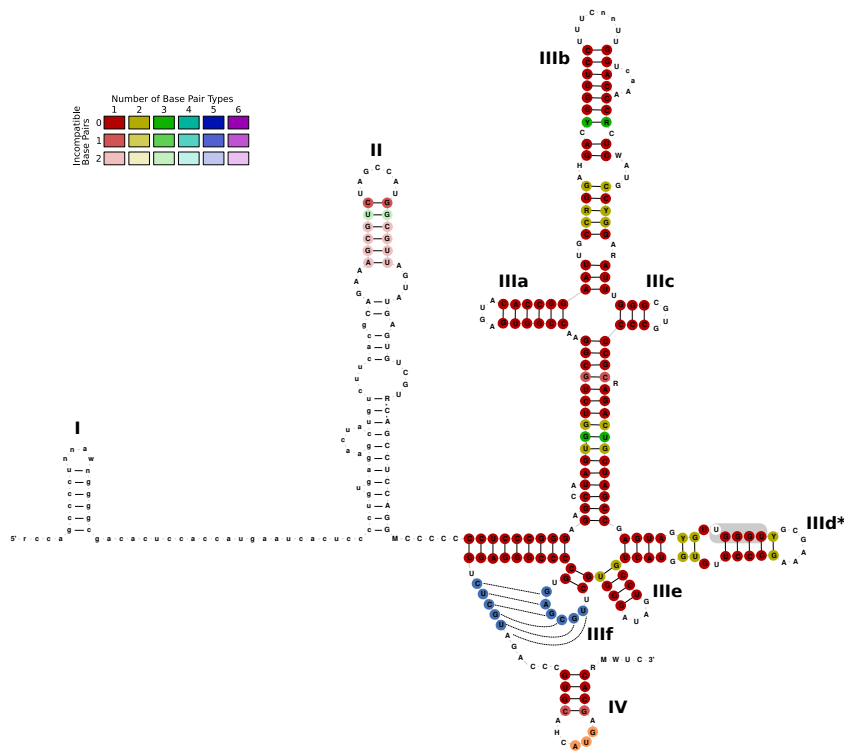

**B**

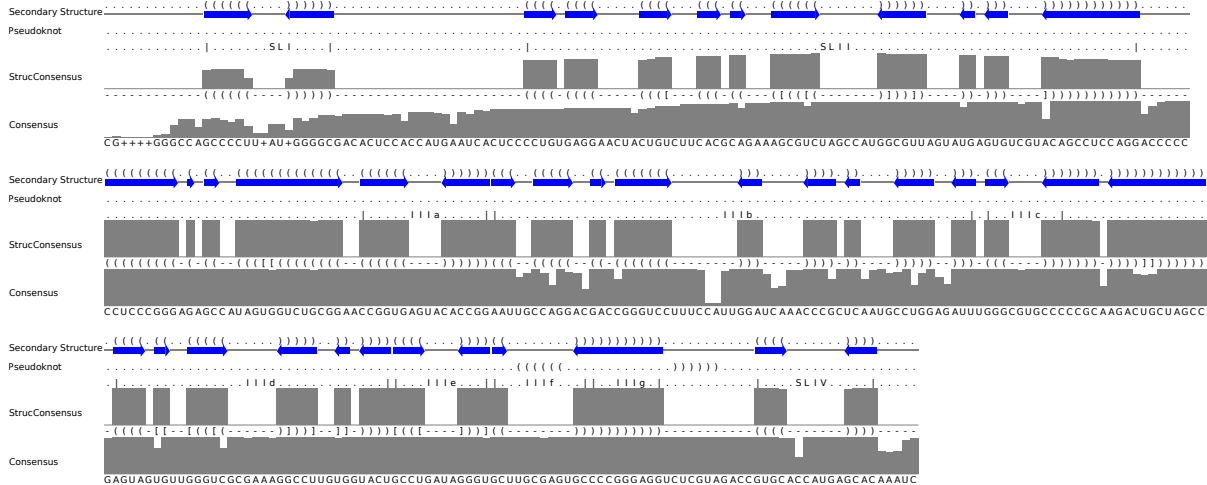

**Figure S2.** Conservation of the HCV 5' UTR. (A) Alignment-based RNA secondary structure prediction of the 5' UTR. Among the selected sequences, 51 isolates had a 5' UTR sequence (please see the additional alignment of only 5' sequences in Figure S3 and F8). The HCV IRES comprises the stem-loops (SLs) II to IV, with the polyprotein start codon located in the loop of SL IV. The IRES structure shows the same alternative structure of SL IIIId\* as in<sup>10</sup> due to the slightly lower MFE (-116.90 kcal/mol) compared to the 'classical' experimentally validated structure. The sequence UGGGU that would be in the apical loop of the classical form of SL IIIId is marked by the gray box. Only the nucleotides involving the loop of SL IIIIf and part of the single-stranded stretch upstream of SL IV were manually manipulated to form a pseudoknot (blue), while the sequences involved in this pseudoknot actually were predicted to be single-stranded in the structure alignment. A low degree of covariance (see color code) suggests that not only the RNA secondary structure shown here is important but there may be also a requirement for overlapping *cis*-elements. The start codon (AUG) is marked in orange. The lower parts of the SL II appear largely white because on 41 sequences contain the stem-loop. (B) Sequence and RNA secondary structure features as in Figure 1 B.

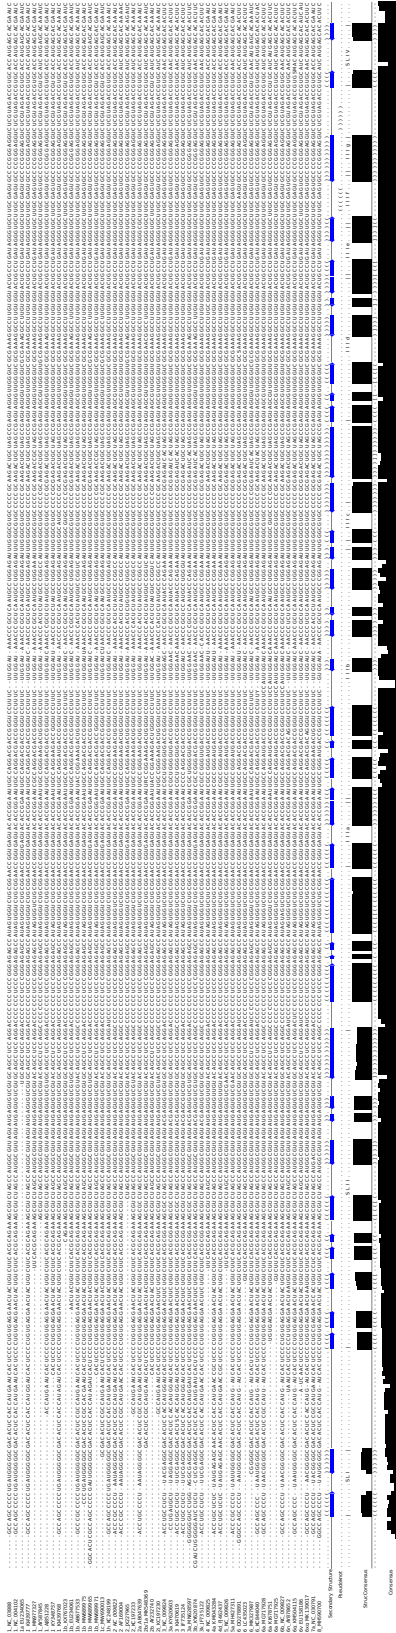

**Figure S3.** (related to [Figure S2](#)) Nucleotide alignment and additional sequence and RNA secondary structure features as in [Figure 2 C](#) of the 51 sequences fully covering the 5' UTR.



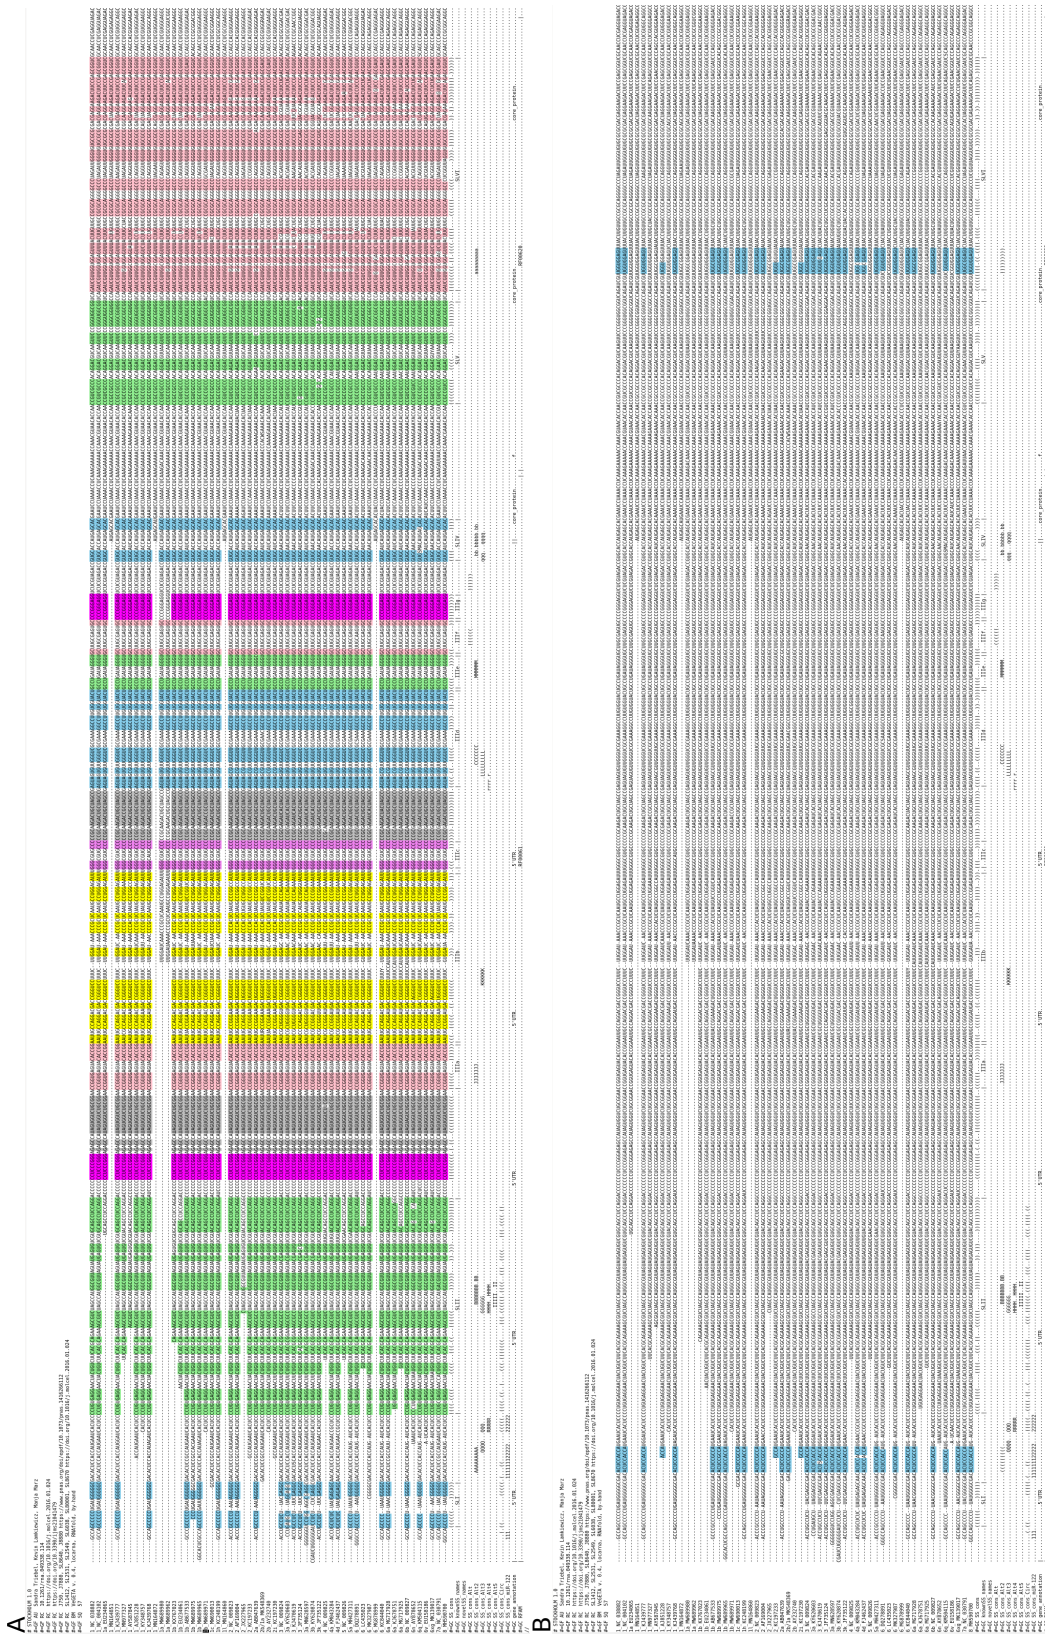

**Figure S4.** (Nucleotide alignment of HCV 5' UTR and the start of the core gene of the 51 sequences fully covering the 5' UTR show in Emacs in RALEE mode<sup>49</sup>. (A) Alignment coloured according to RNA secondary structures SLI, IRES, SLV, and SLVI. (B) Alignment coloured according to the interaction of interdomain I and II with the left strand of domain VI.



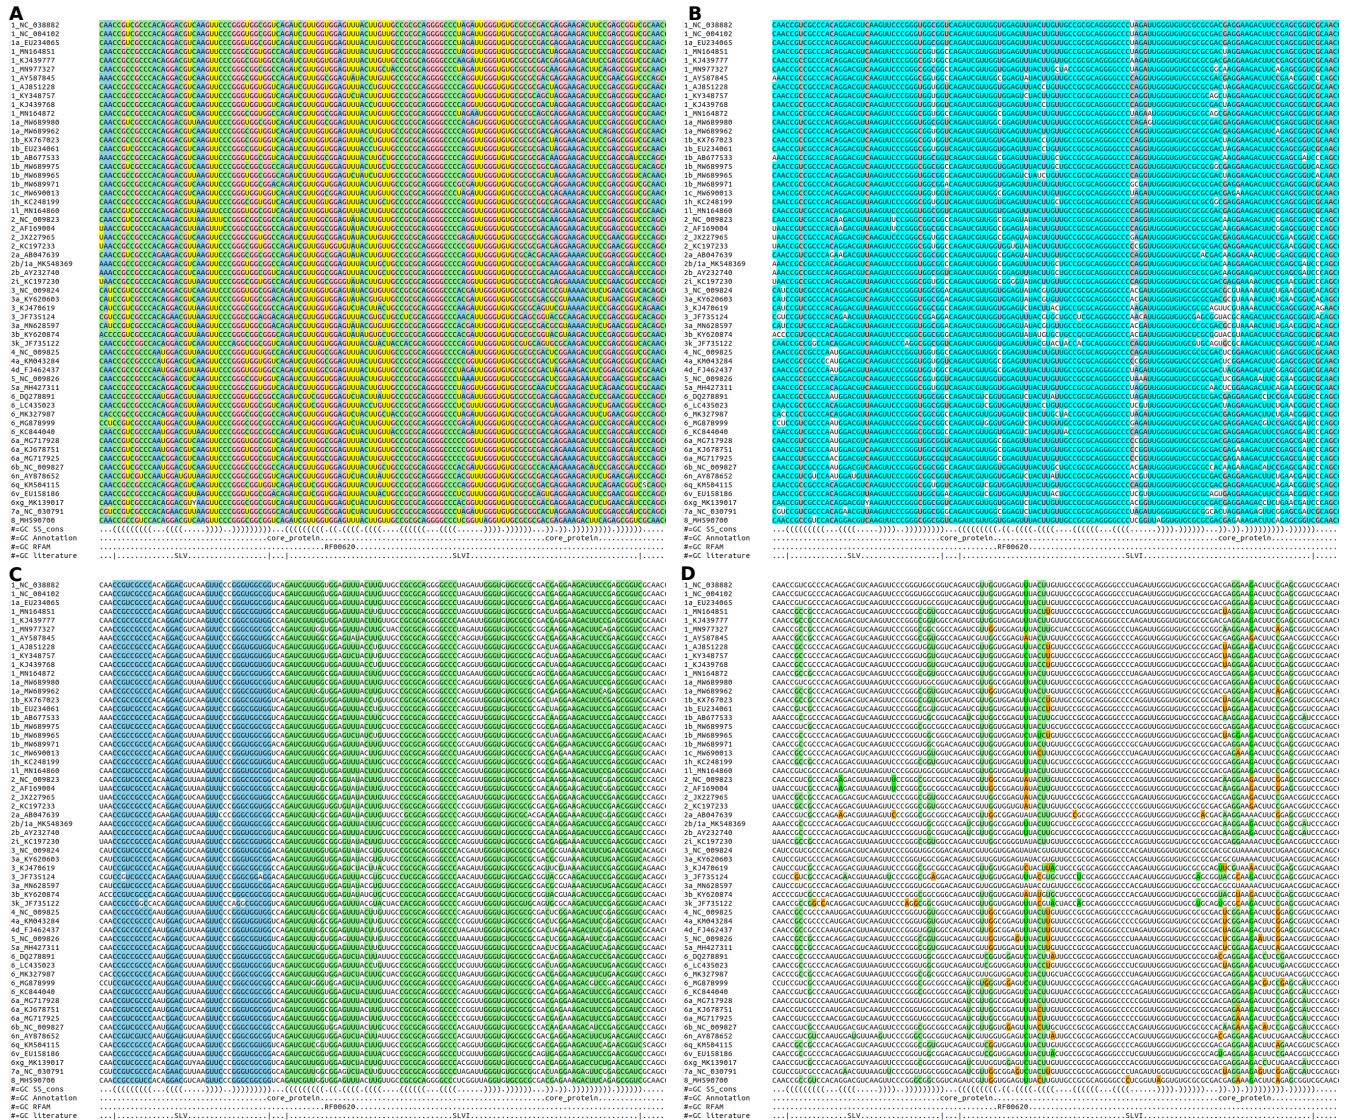

**Figure S5.** Nucleotide alignment visualization using Emac's in RALEE mode<sup>49</sup> displaying (A) nucleotide identity, (B) sequence conservation, (C) consensus RNA secondary structure, and (D) compensatory mutations.

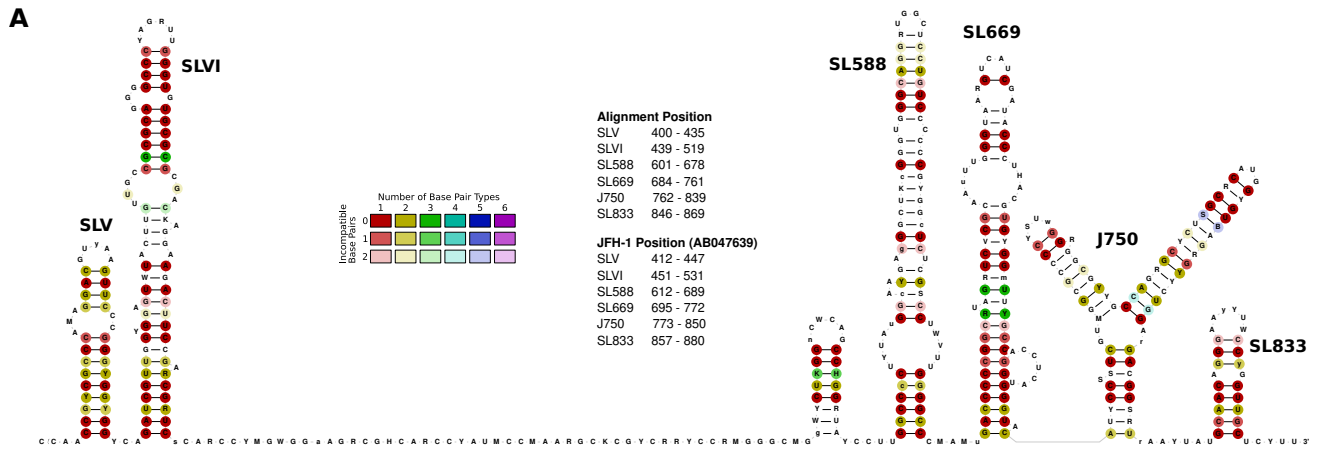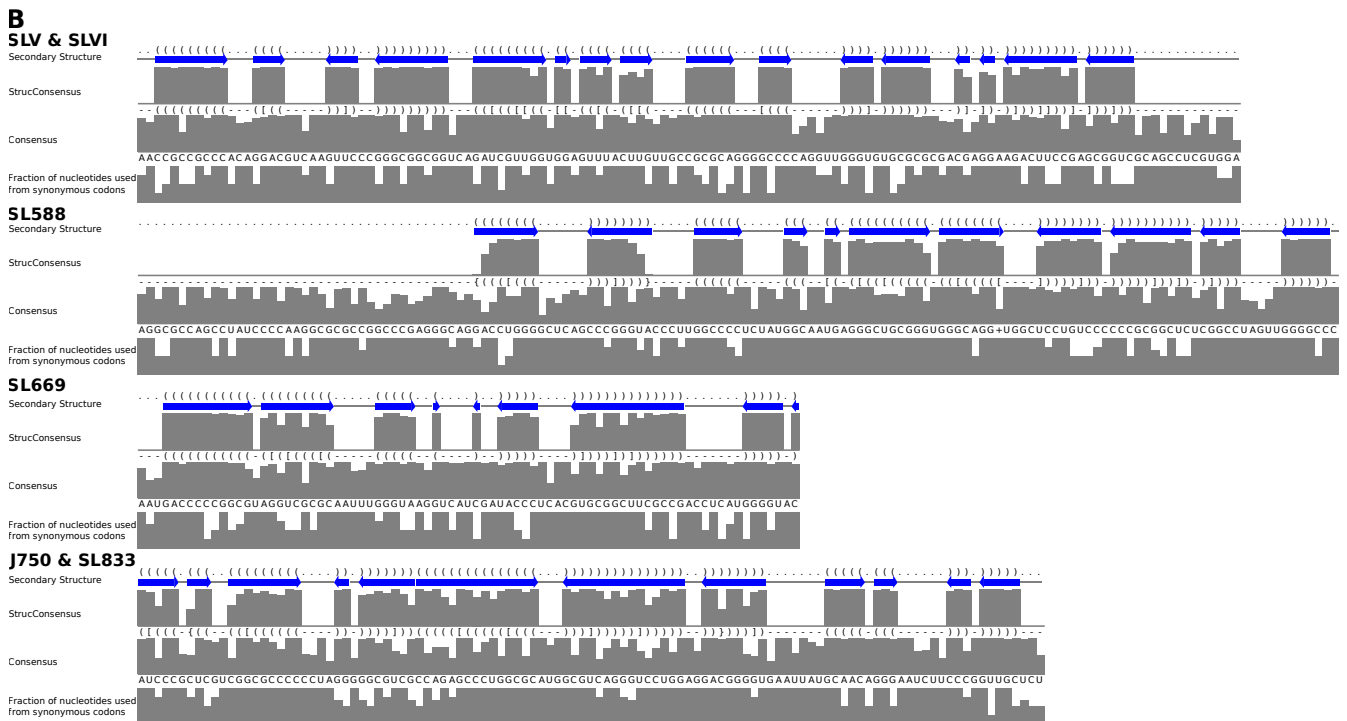

**Figure S6.** Conserved RNA secondary structures in the core coding region. (A) Structures shown with base color code illustrating the extent of covariations in double-stranded regions like in Figure S2. (B) Sequence and RNA secondary structure features as in Figure 1 B.

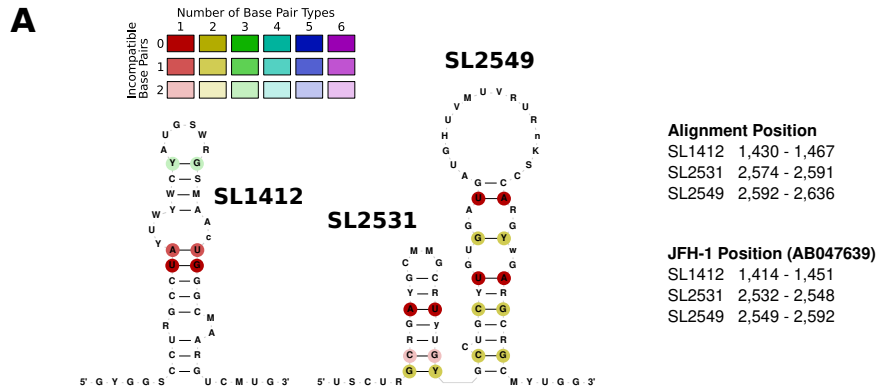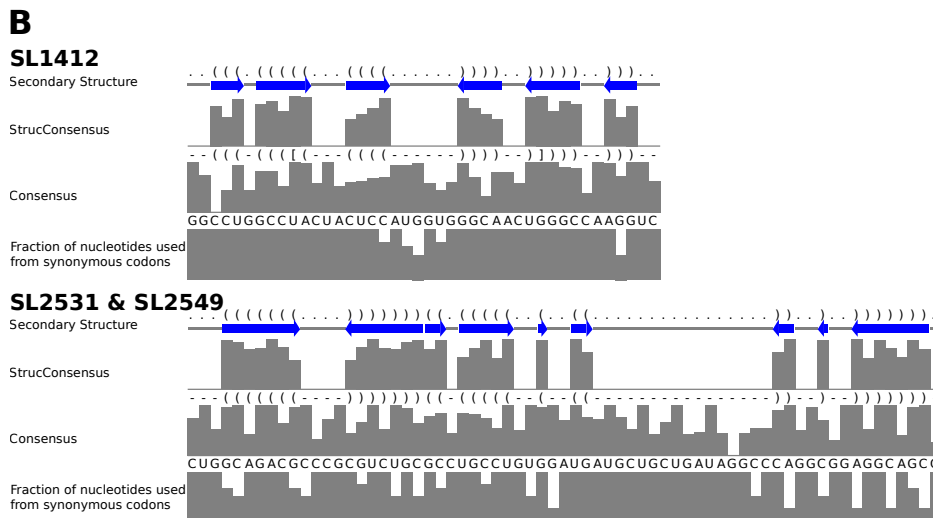

**Figure S7.** (A) Possible RNA secondary structures in the E1 and E2 region with its structural representation in and (B) additional sequence and RNA secondary structure features as in [Figure 1 B](#).



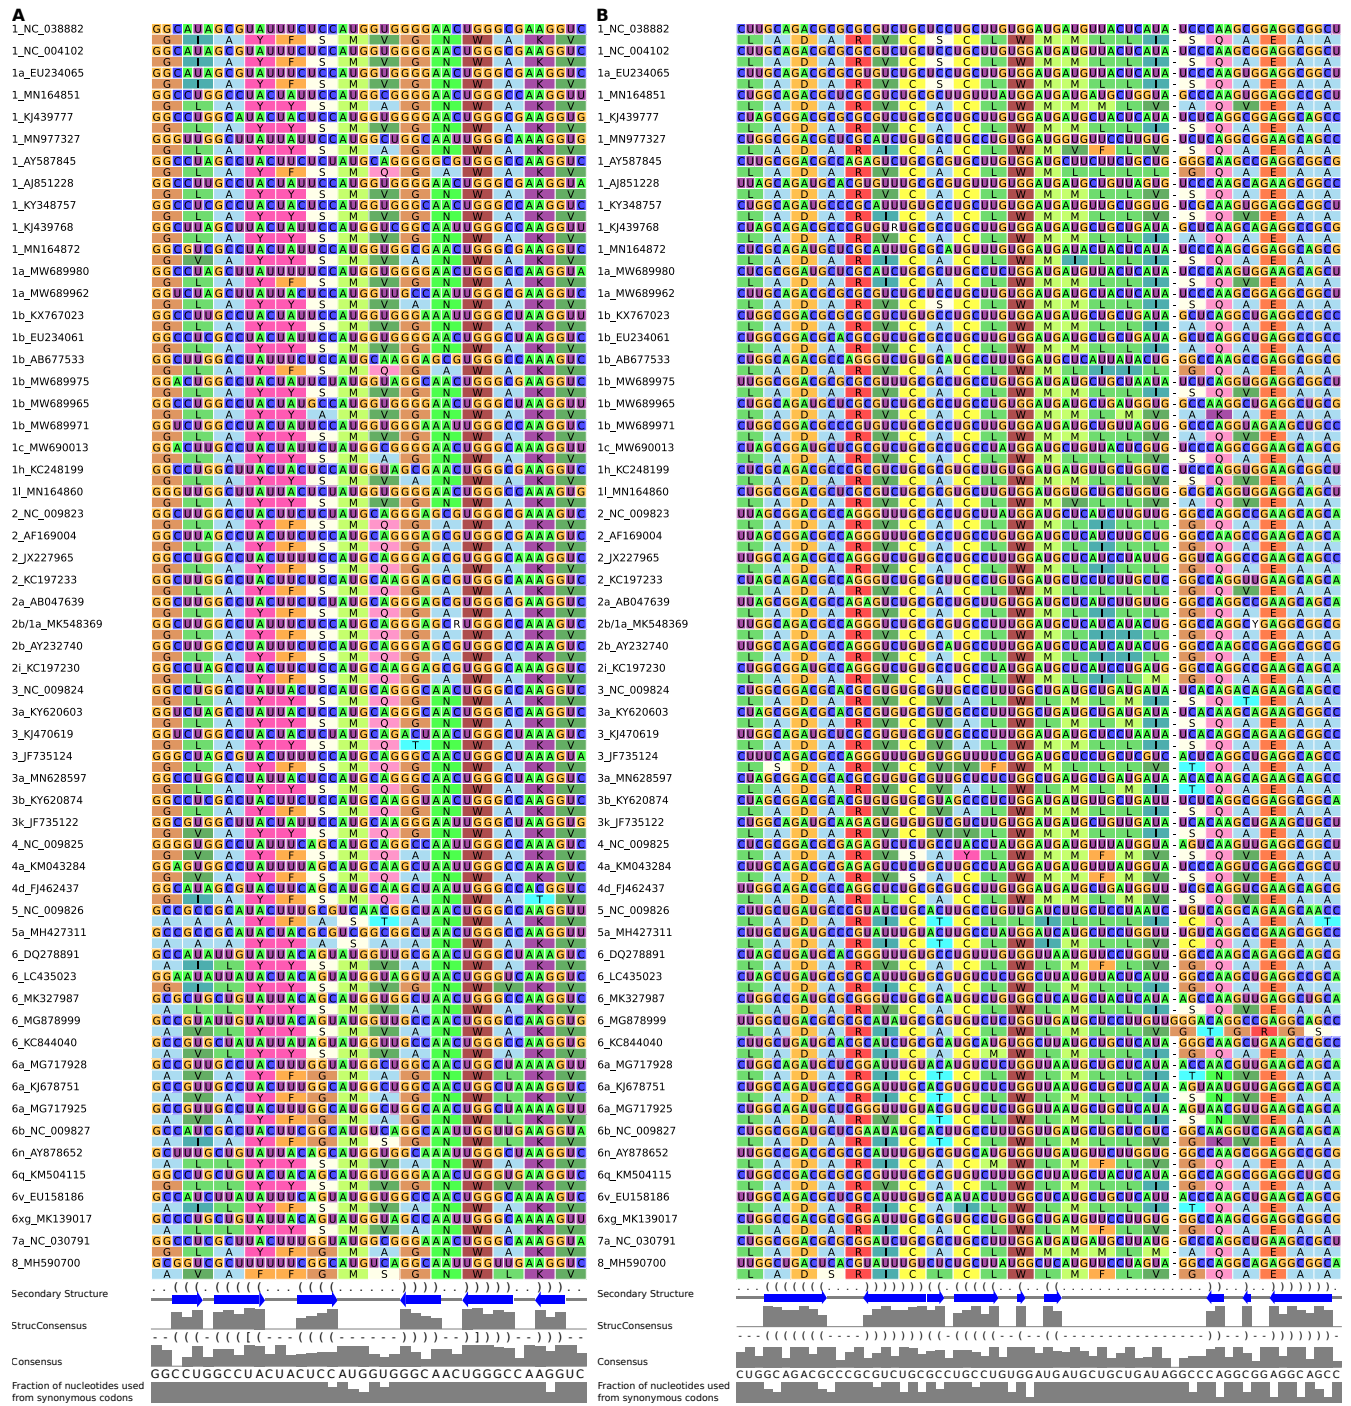

**Figure S8.** (related to [Figure S7](#)) Alignment of nucleotides and proteins combined and additional sequence and RNA secondary structure features as in [Figure 1 B](#) for (A) SL 1412 and (B) SL 2531 and SL 2549.





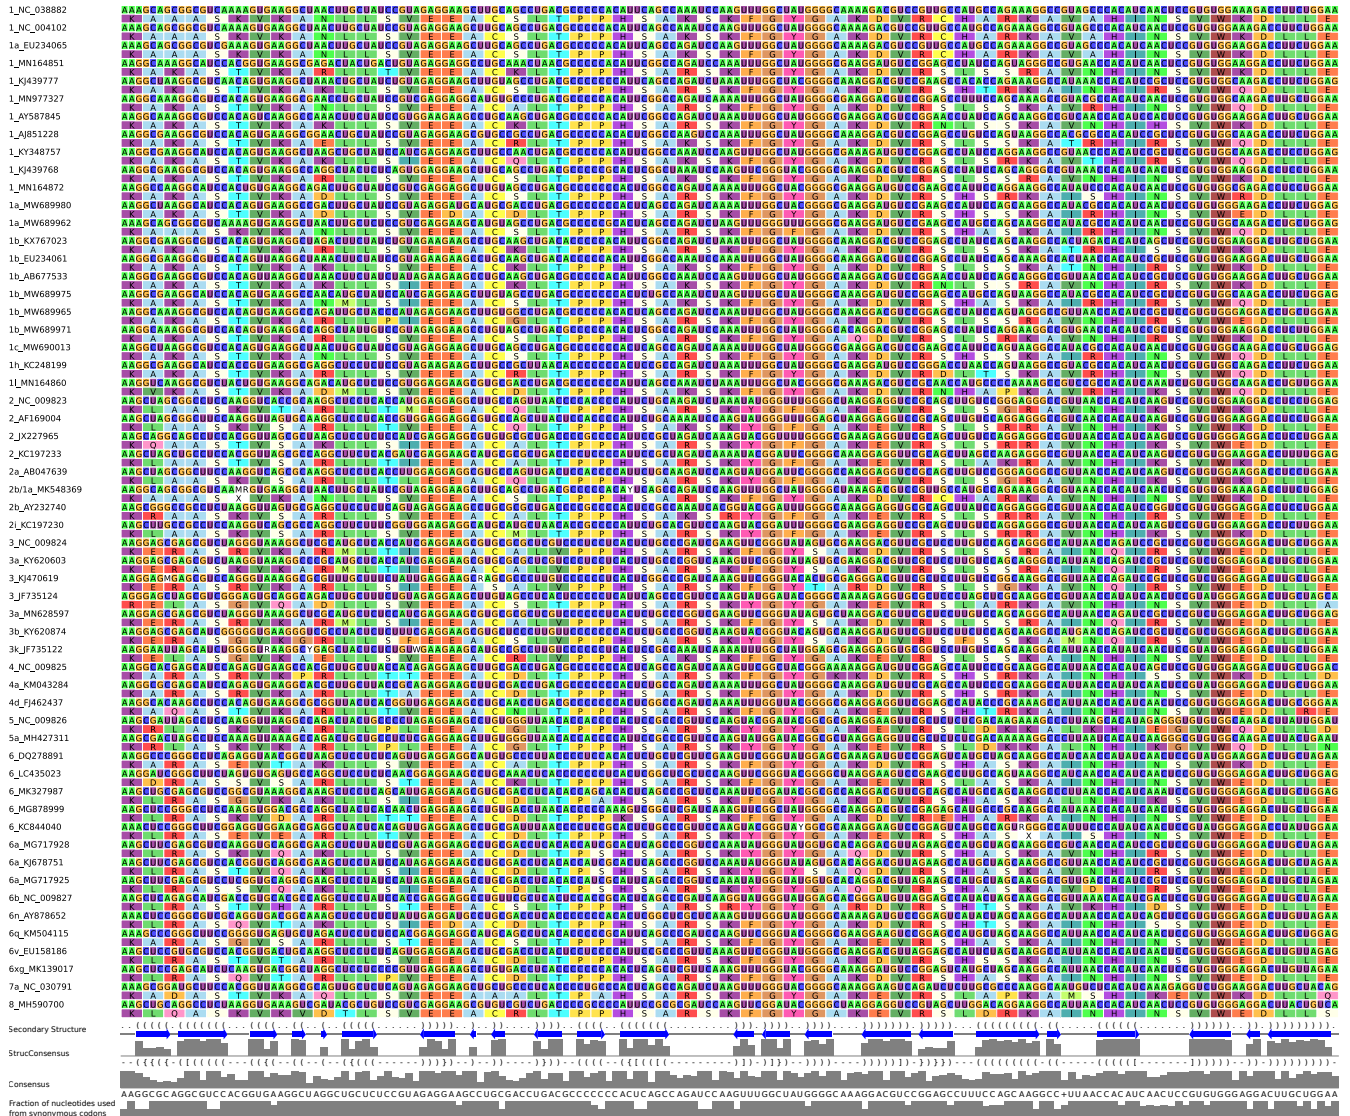

**Figure S10.** (related to [Figure S9](#)) Alignment of nucleotides and proteins combined and additional sequence and RNA secondary structure features as in [Figure 1 B](#) for J7880 and SL 8001.

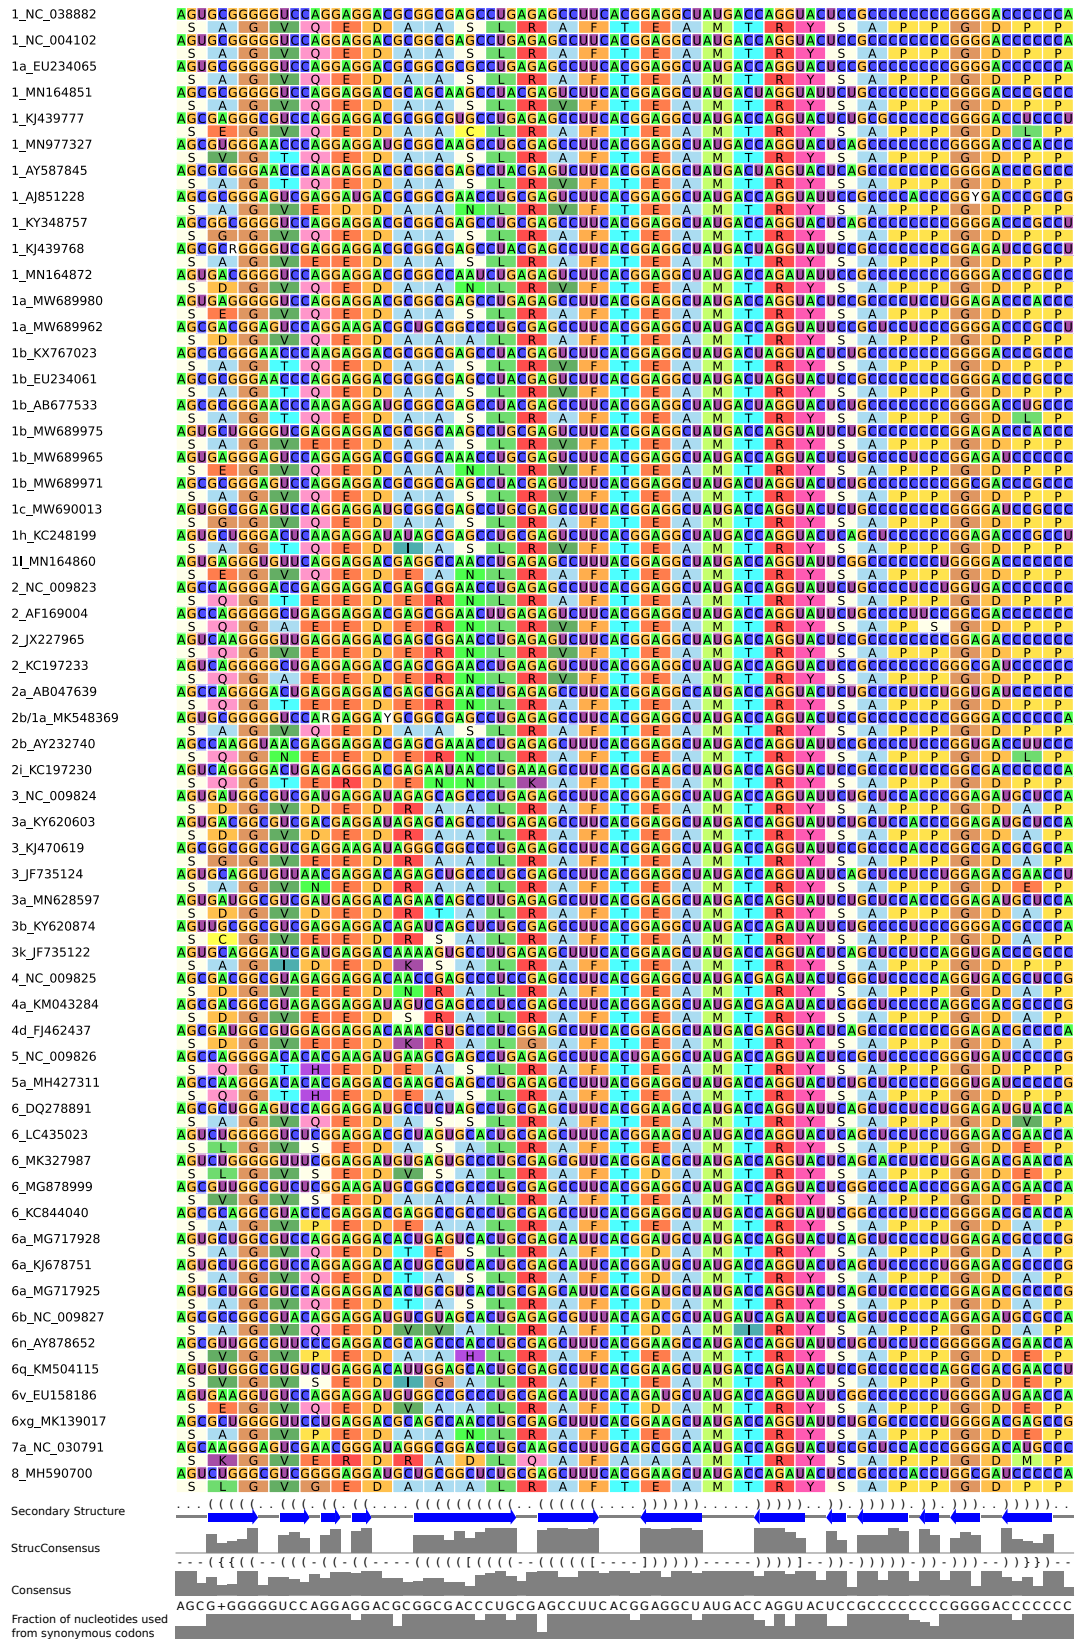

**Figure S11.** (related to [Figure S9](#)) Alignment of nucleotides and proteins combined and additional sequence and RNA secondary structure features as in [Figure 1 B](#) for SL 8670.



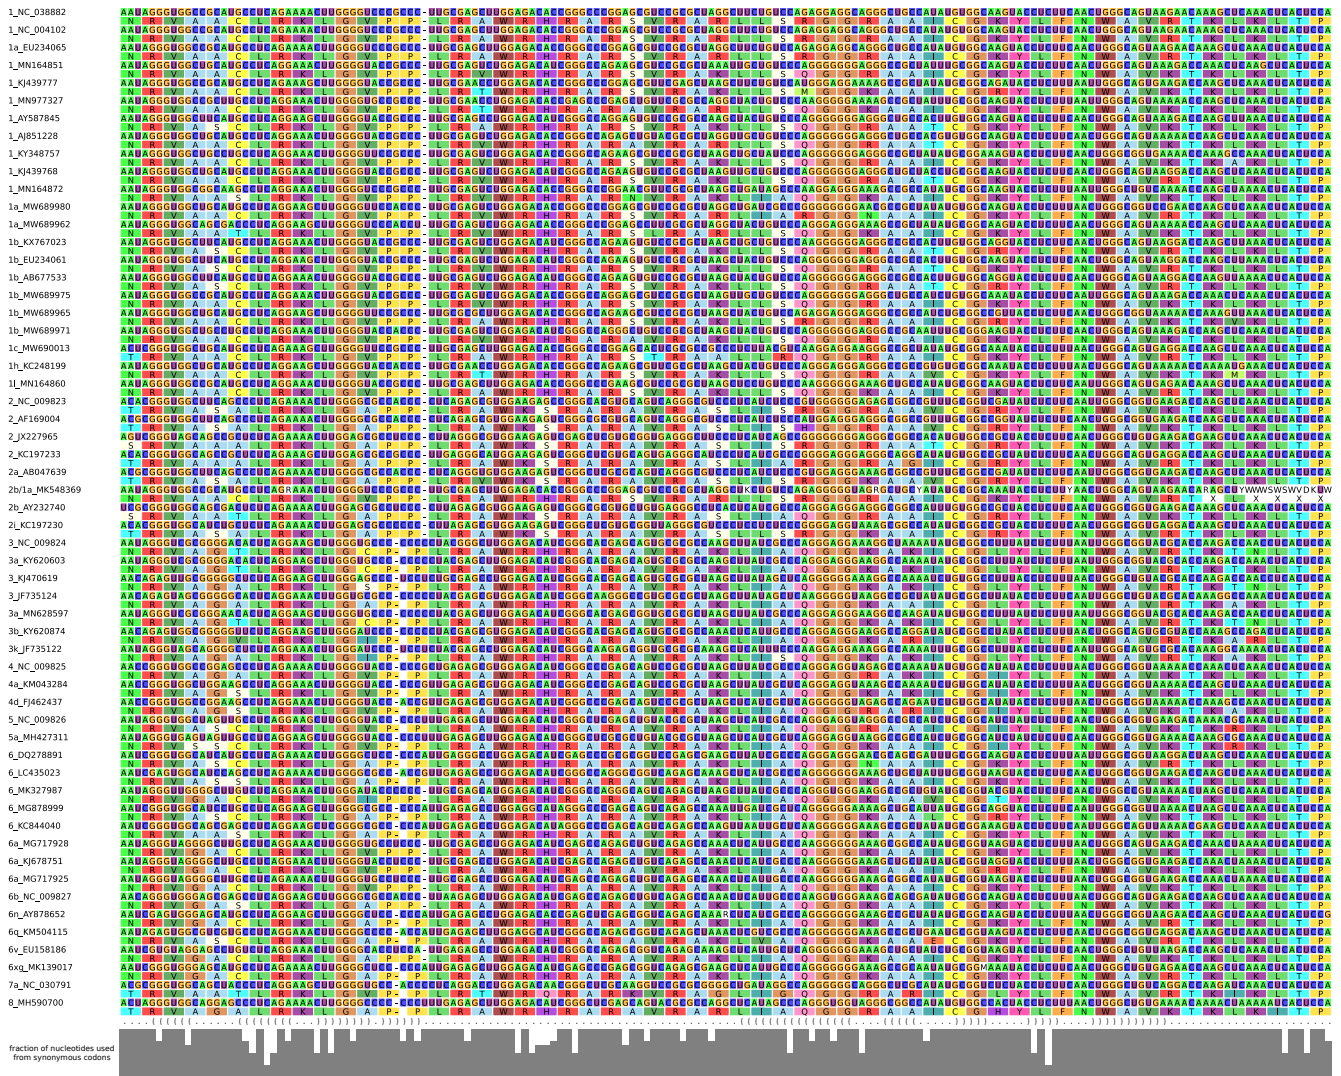

**Figure S12.** (related to [Figure 1](#)) Alignment of nucleotides and proteins combined and additional sequence and RNA secondary structure features as in [Figure 1 B](#) for 5BSL1 and 5BSL2.



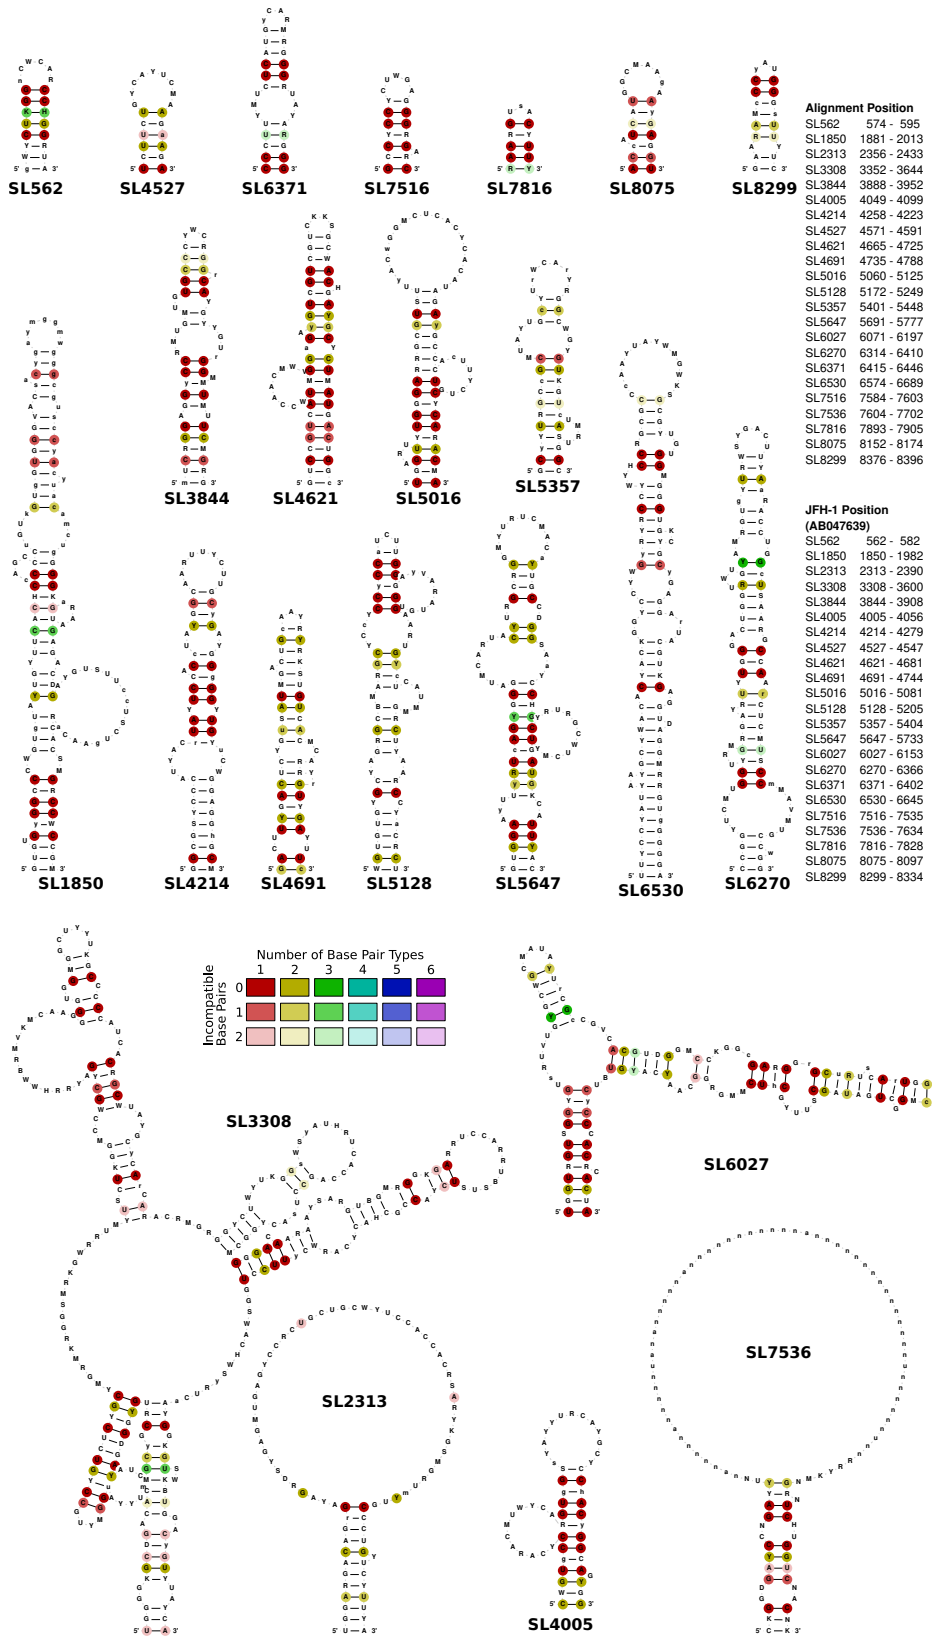

**Figure S15.** 23 novel conserved RNA secondary structure candidates from coding regions of the HCV alignment. RNA secondary structures are colored as in Figure 1 A.

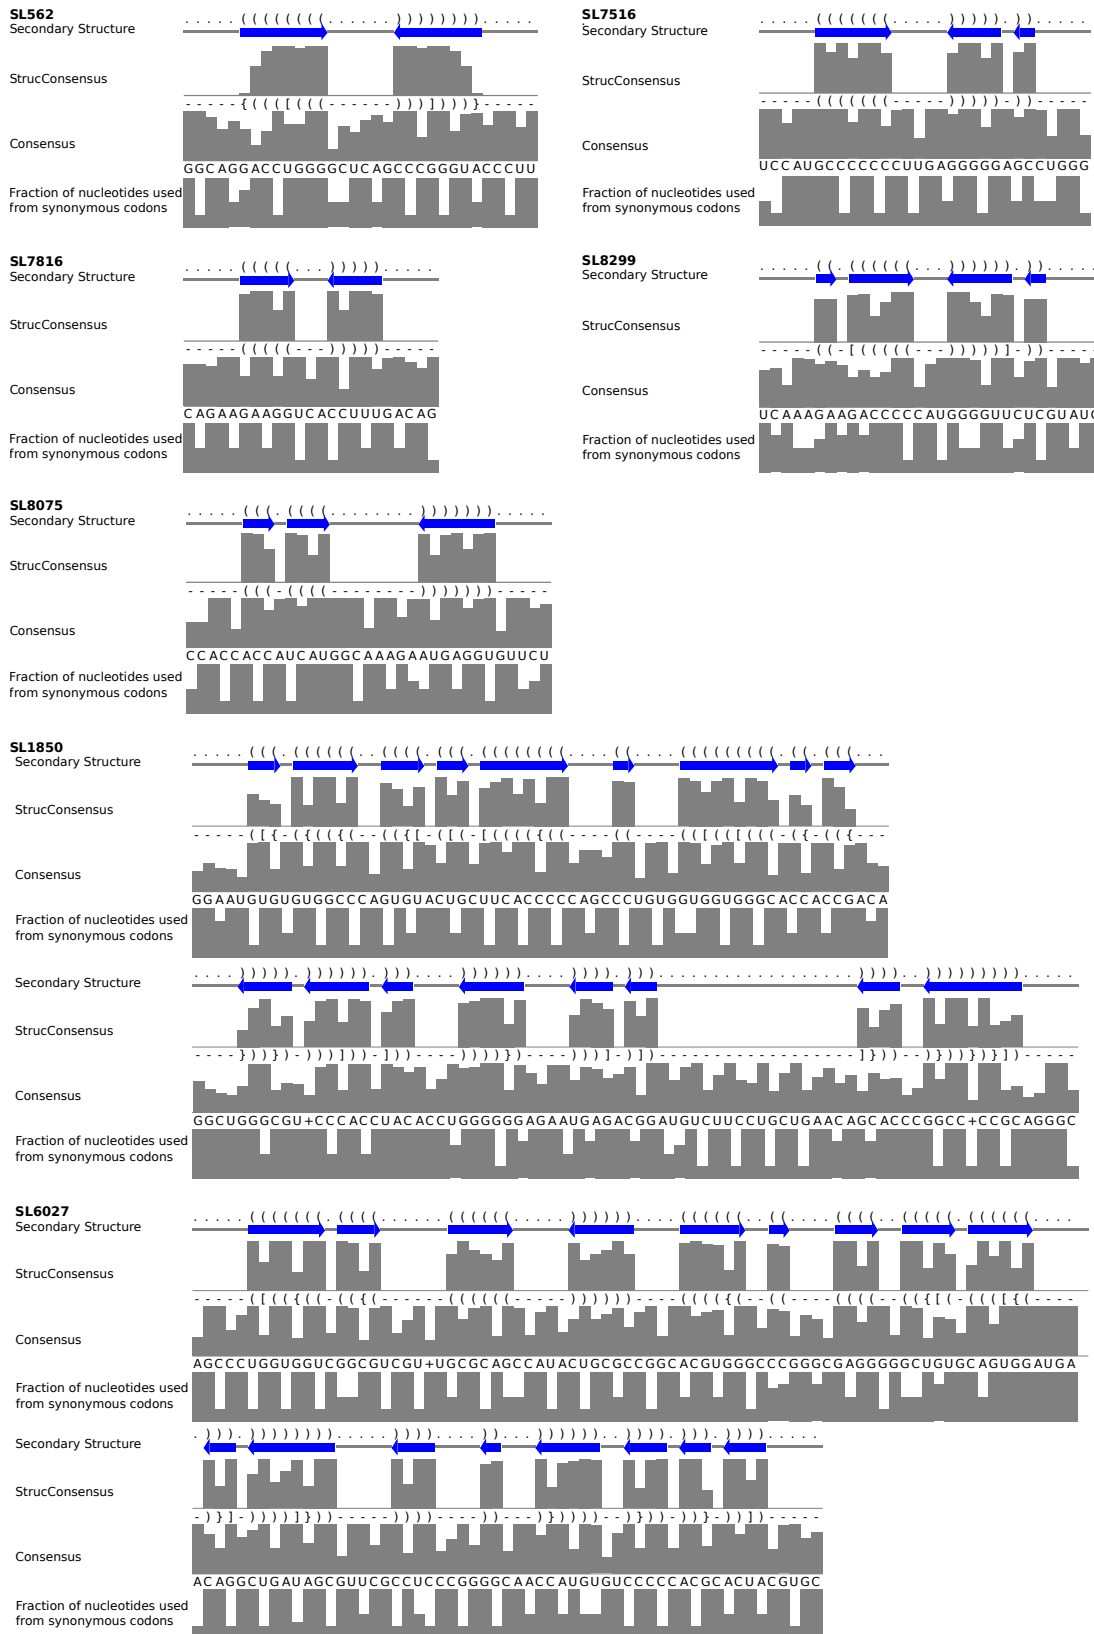

**Figure S16.** (related to [Figure 3](#)) Additional sequence and RNA secondary structure features as in [Figure 1 B](#) for seven novel conserved RNA secondary structure candidates.

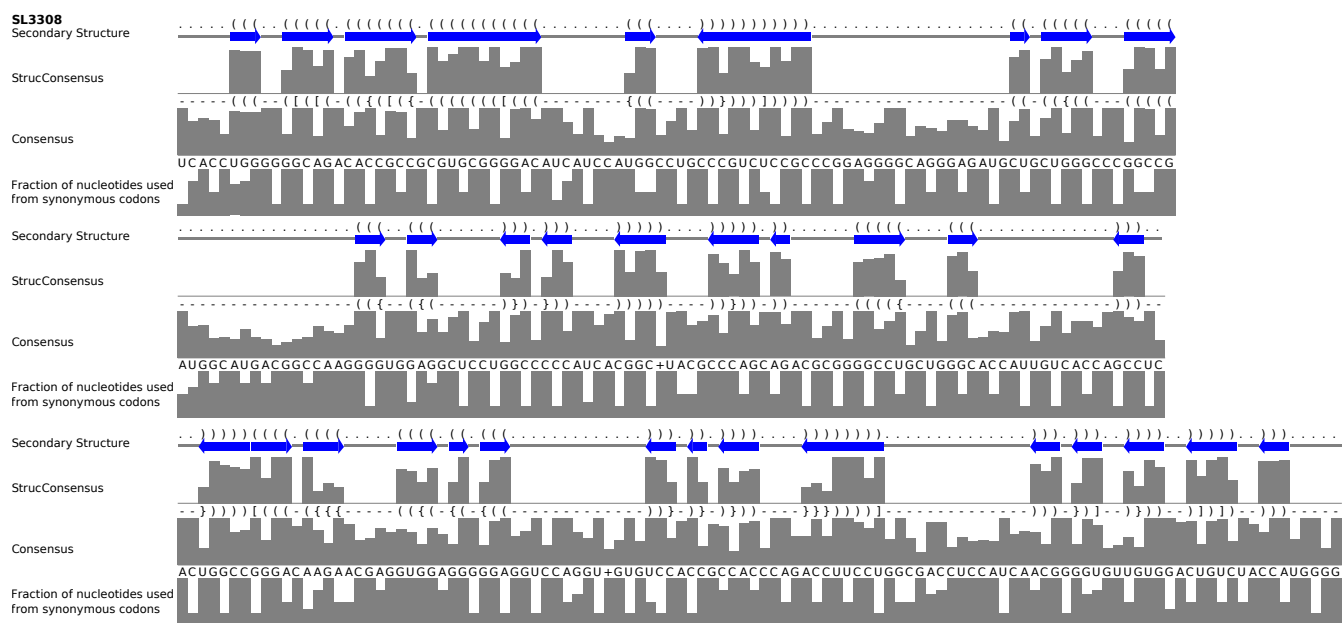

**Figure S17.** (related to [Figure 3](#)) Additional sequence and RNA secondary structure features as in [Figure 1 B](#) for SL 3308 as novel conserved RNA secondary structure candidate.
